# Supplementary material
Source: publisher figshare collection journal article supplement (https://rs.figshare.com/ndownloader/files/17890577)
Supplement: Supplementary file 1 [file 17890577]

## Sheet: Sheet1
Supplementary Table 2: Fossils used for time calibration. Fossils were used as minimum ages on nodes. For ages that indicate ranges from rock stratum, we used the youngest age.
Fossil Species	Relationship	Time period	Age	Authority
Septencoracias morsensis	Stem Coraciidae + Brachypteraciidae	Early Eocene	54.04	Bourdon et al. 2016
Miocoracias chenevali	Crown Coraciidae	Early Miocene, Agenian	21-20.4	Mourer-Chauviré et al. 2013
Palaeotodus escampsiensis	Stem todidae	Late Eocene, Priabonian	37.8-33.9	Mourer-Chauviré 1985
